# Supplementary material for: Zn(ii) and Cd(ii) pincer complexes bearing meta alkylated pyridinium amidates; synthesis & preliminary anticancer studies
Source: Royal Society of Chemistry journal article supplement (doi:10.1039/d3nj04131j), 2023-01-01
Supplement: d3nj04131j1.pdf [file d3nj04131j1.pdf]

## Zn(II) and Cd(II) Pincer Complexes Bearing Meta Alkylated Pyridinium Amidates; Synthesis & Preliminary Anticancer Evaluation

Sara Masood<sup>a</sup>, Usman Munir Babar<sup>a</sup>, Gul-e-Saba Chaudhry<sup>b</sup>,  
Muhammad Ashfaq<sup>c</sup>, Muhammad Nawaz Tahir<sup>c</sup> and M. Naveed Zafar<sup>a\*</sup>

<sup>a</sup> Department of Chemistry, Quaid-i-Azam University, Islamabad 45320, Pakistan

<sup>b</sup> Institute of Marine Biotechnology, Universiti Malaysia, Terengganu 21030, Malaysia

<sup>c</sup> Department of Physics, University of Sargodha, Sargodha 40100, Pakistan

Email: [mnzafar@qau.edu.pk](mailto:mnzafar@qau.edu.pk)

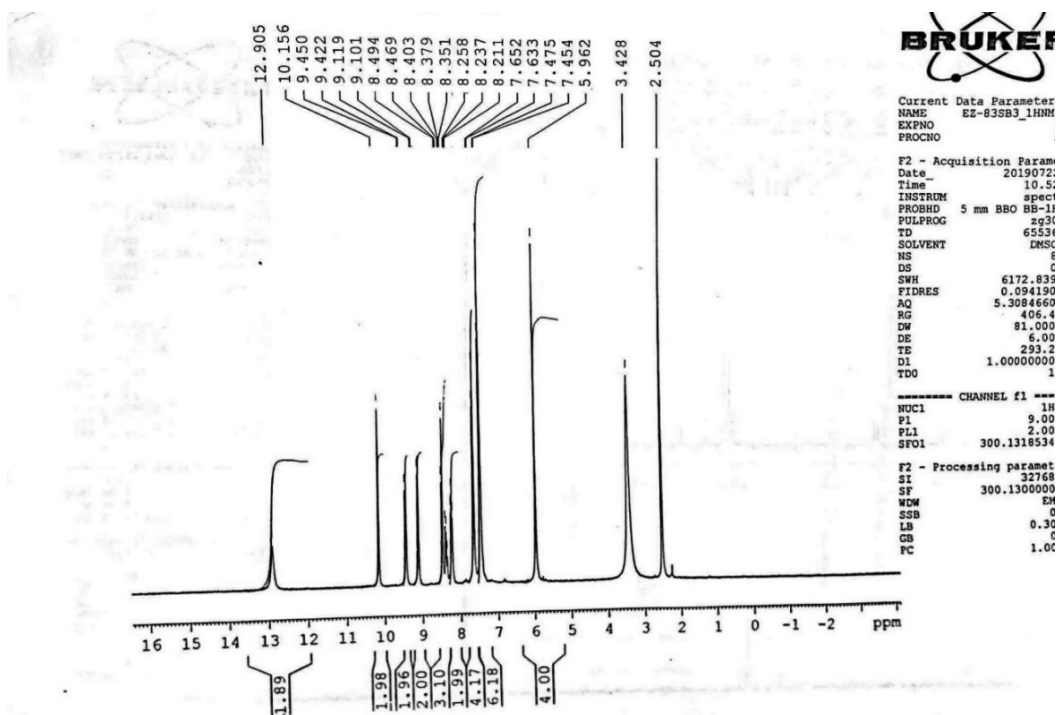

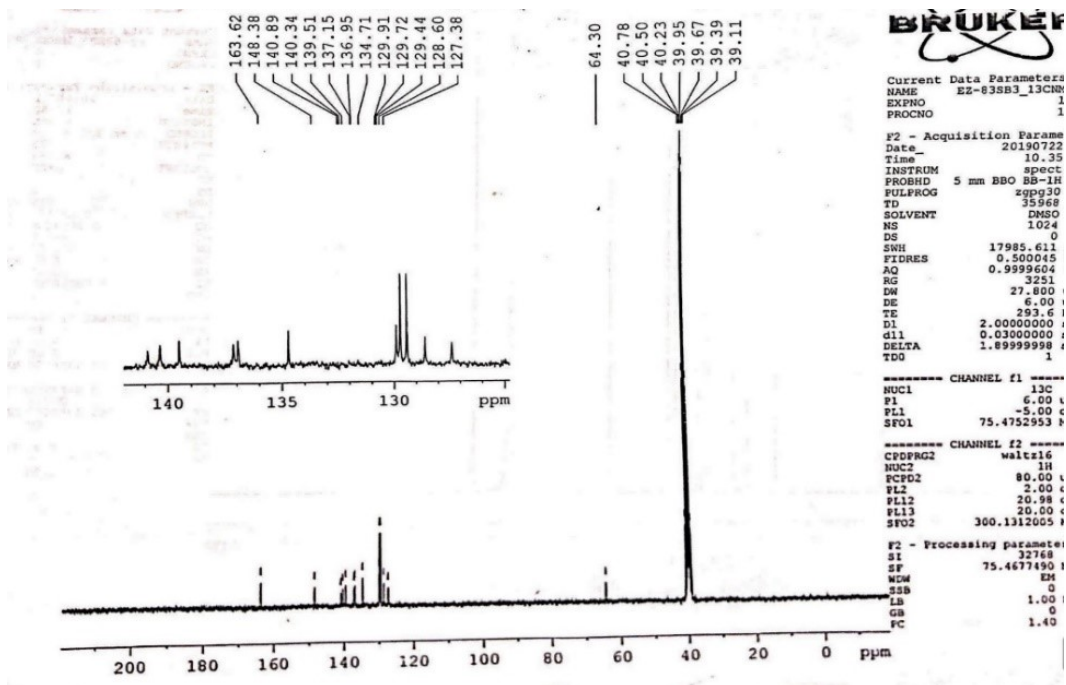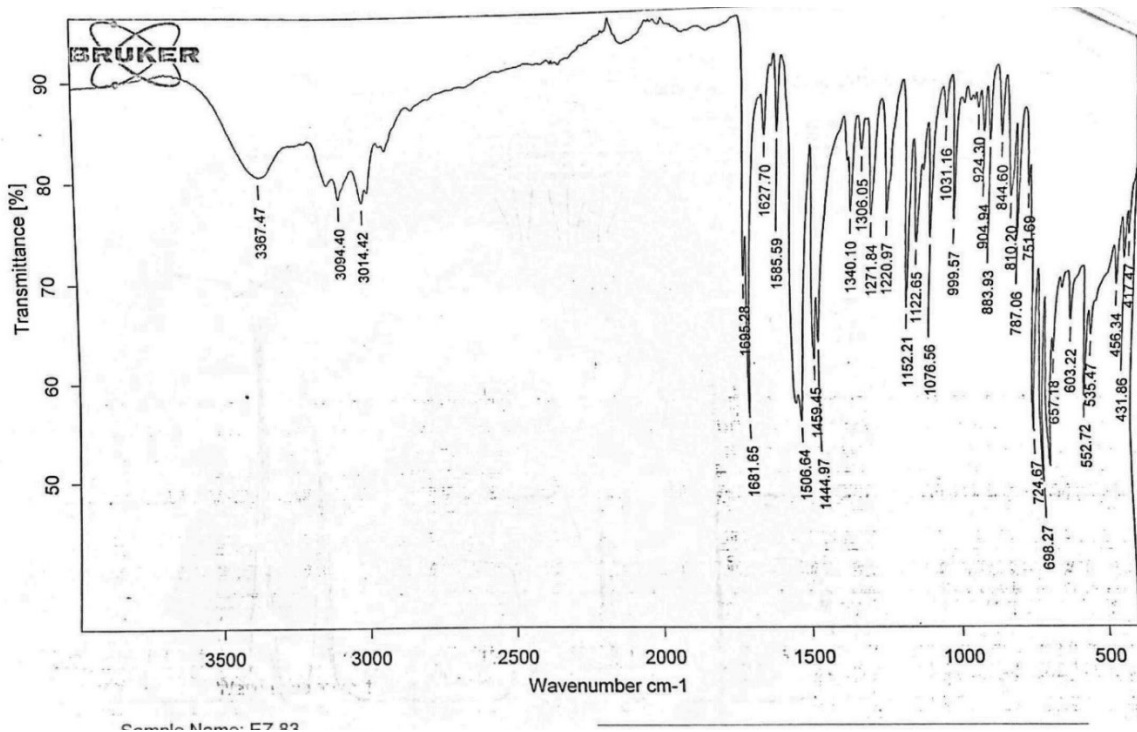

Fig. S1.  $^1\text{H}$ ,  $^{13}\text{C}$ NMR and FT-IR spectra of  $\text{H}_2\text{L}^m(\text{Bn})(\text{Cl})_2$

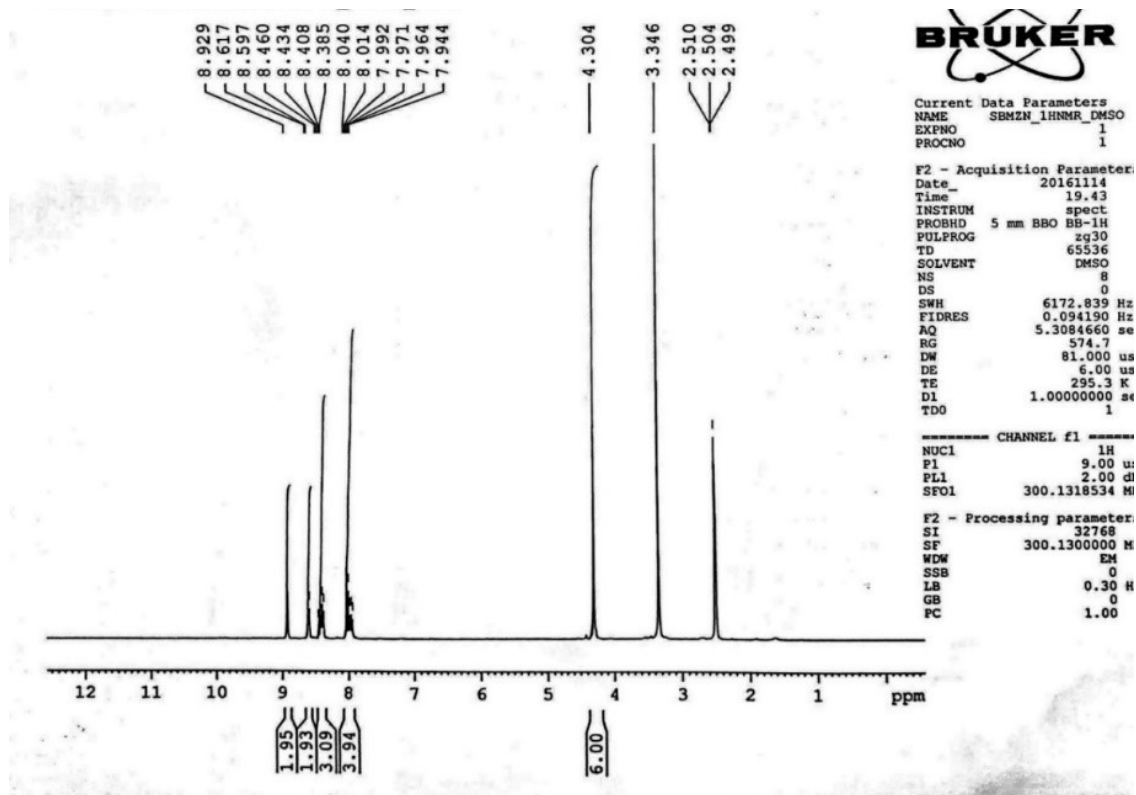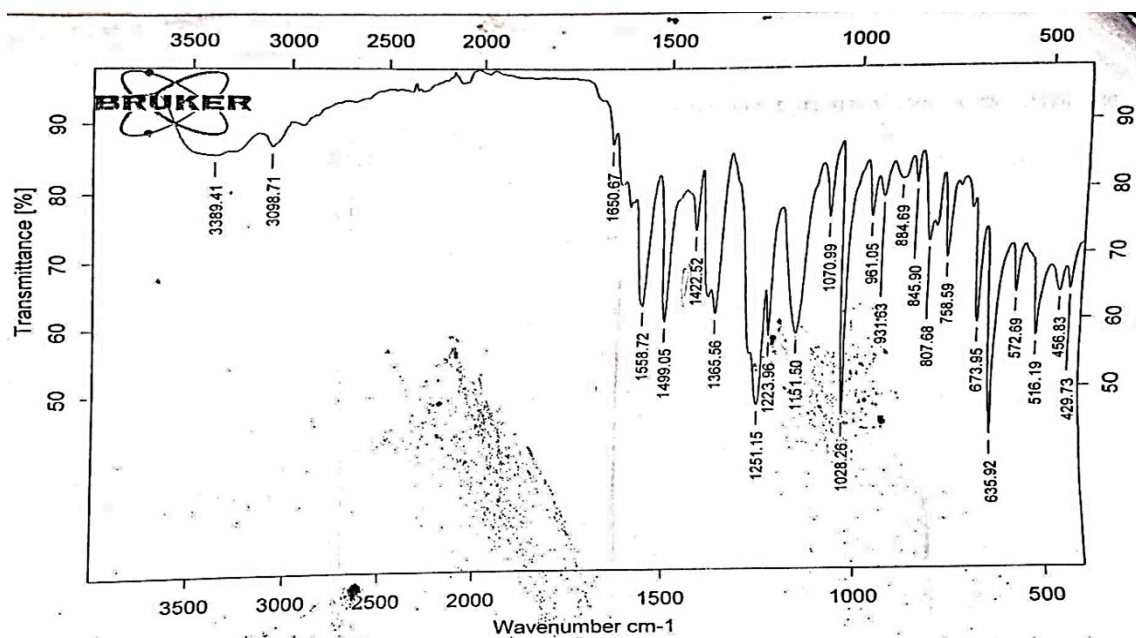

Fig. S2.  $^1\text{H}$  and FT-IR spectra of  $[\text{Zn}(\text{L}_{\text{Me}}^m)(\text{OTf})_2]$  (C1)

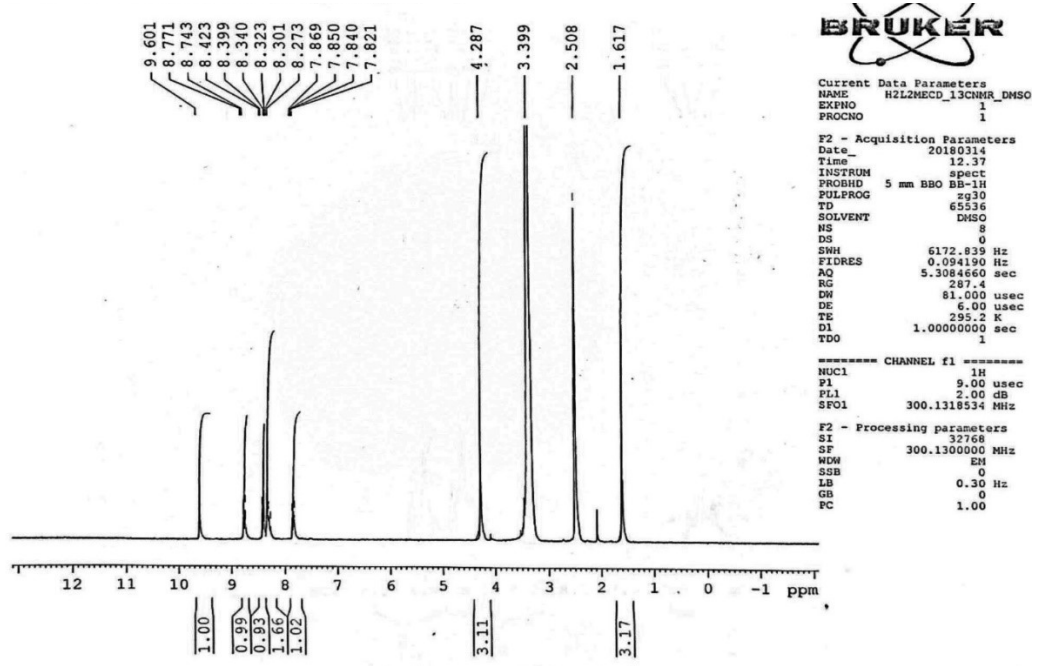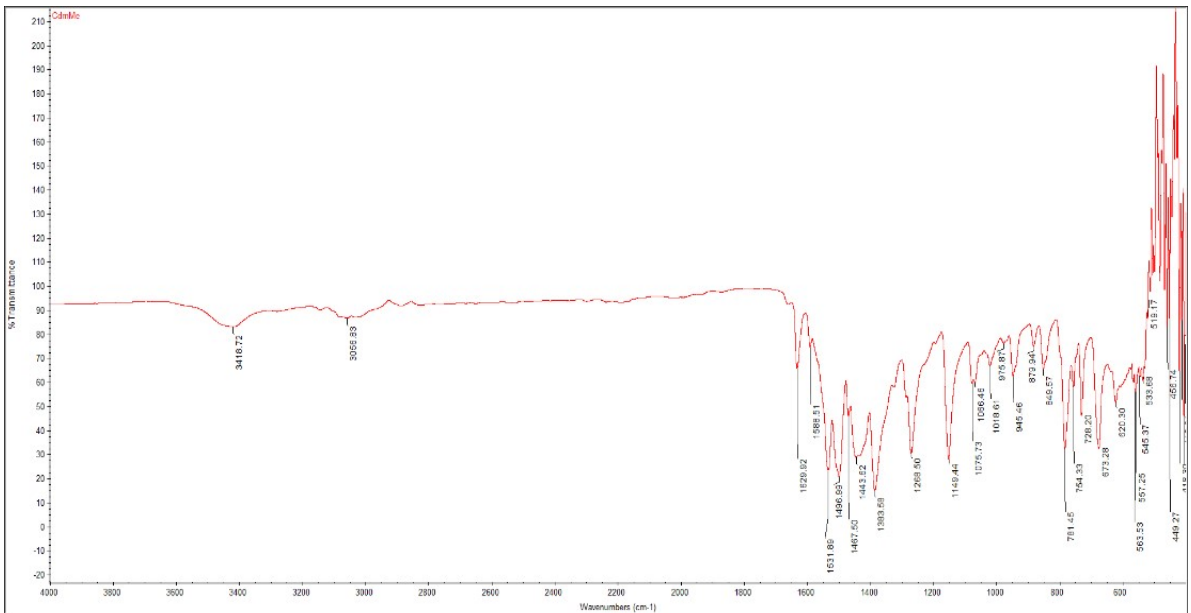

Fig. S3. <sup>1</sup>H and FT-IR spectra of [Cd(L<sup>m</sup><sub>Me</sub>)(Cl)(OAc)] (C2)

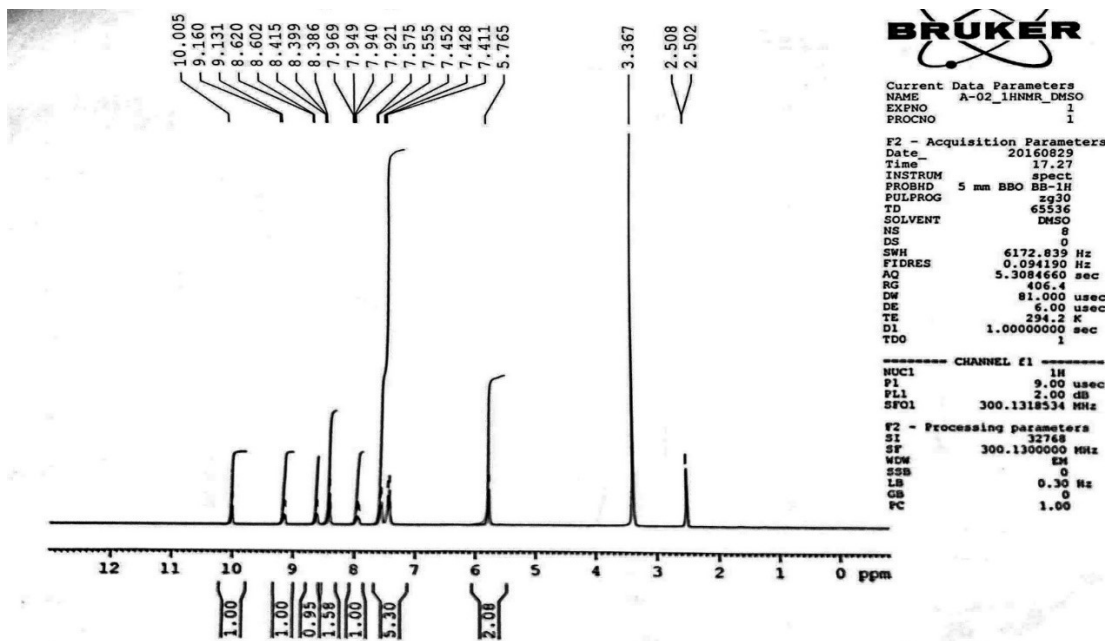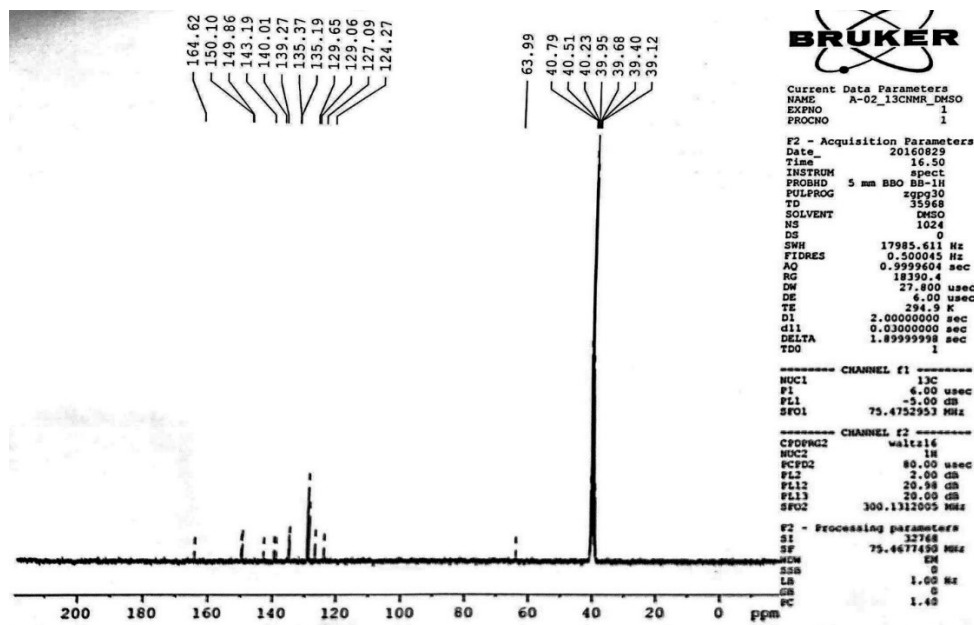

Fig. S4.  $^1\text{H}$ , and  $^{13}\text{C}$ NMR spectra of  $[\text{Zn}(\text{L}_{\text{Bn}}^m)(\text{Cl})_2]$  (C3)

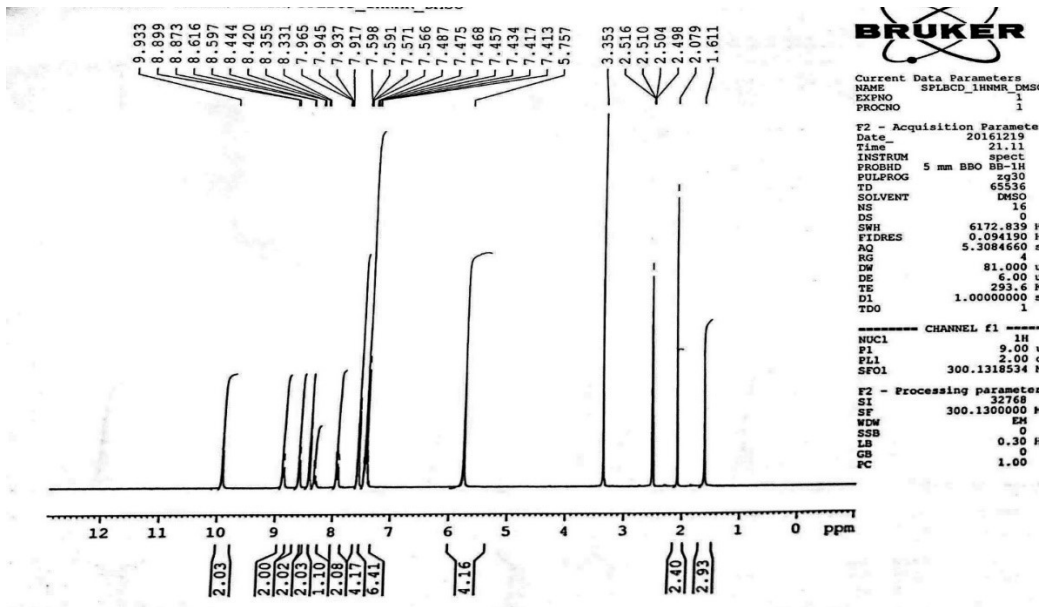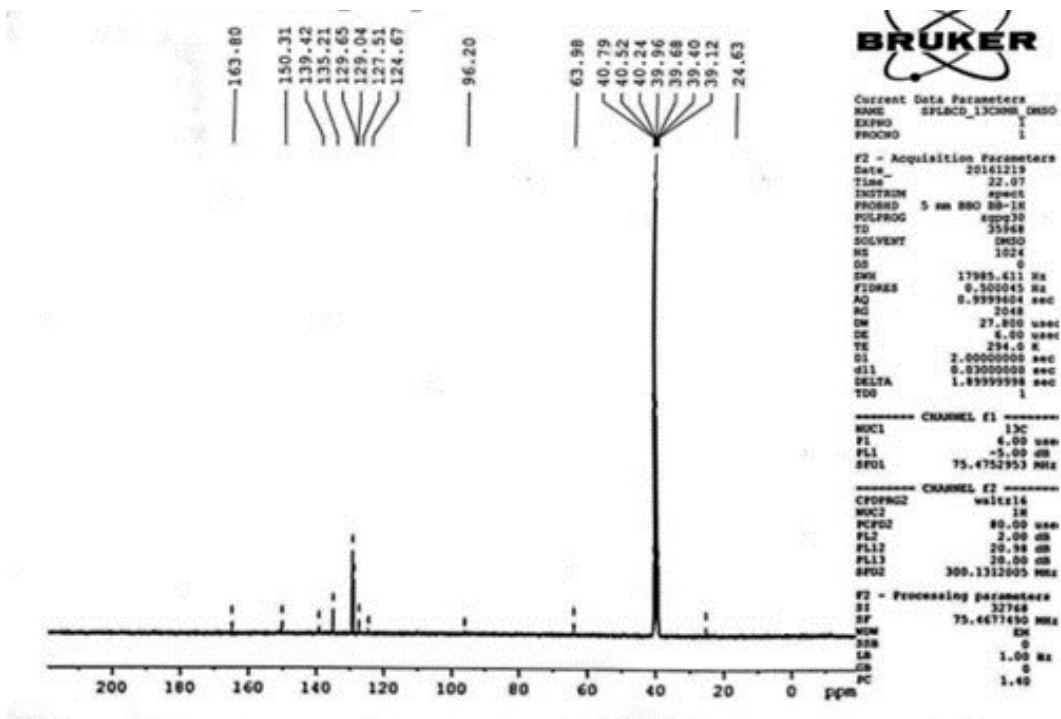

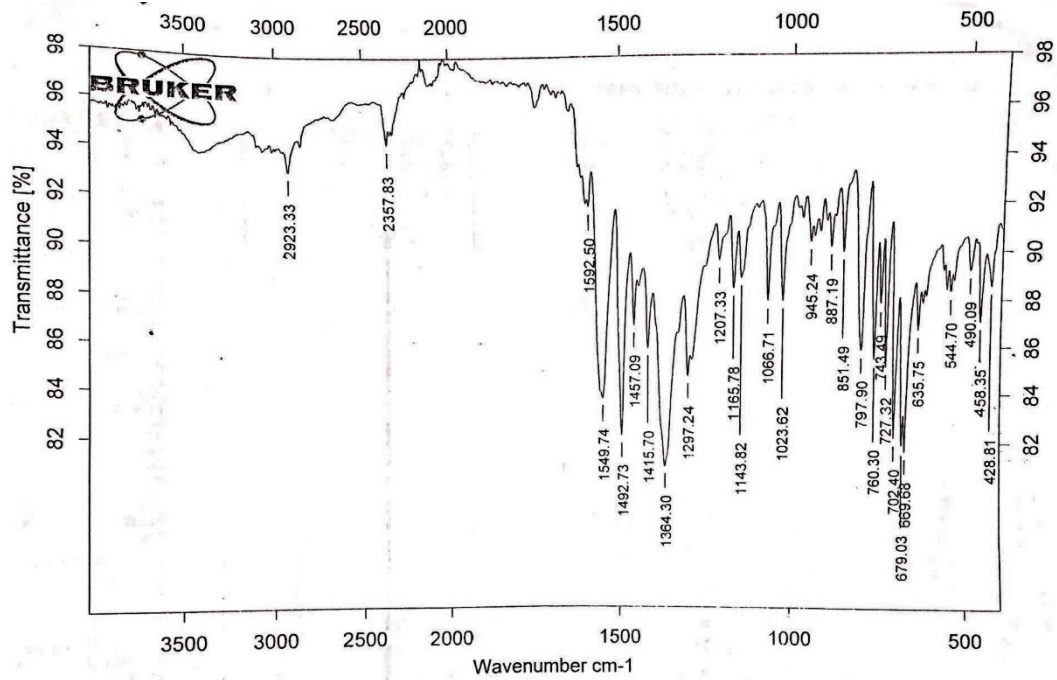

Fig. S5. <sup>1</sup>H, <sup>13</sup>CNMR and FT-IR spectra of  $[Cd(L^m_{Bn})(Cl)(OAc)]$  (C4)



| <b>Crystal data</b>                                                                           | <b>C3</b>                                                              | <b>C4</b>                            |
|-----------------------------------------------------------------------------------------------|------------------------------------------------------------------------|--------------------------------------|
| <b>CCDC</b>                                                                                   | <b>2265862</b>                                                         | <b>2265863</b>                       |
| <b>Chemical formula</b>                                                                       | $C_{62}H_{52}Cl_4N_{10}O_5Zn_2$                                        | $C_{35}H_{31}CdClN_6O_4$             |
| $M_r$                                                                                         | 1289.67                                                                | 747.51                               |
| <b>Crystal system, space group</b>                                                            | Triclinic, $P\bar{1}$                                                  | Monoclinic, $P2_1/n$                 |
| <b>Temperature (K)</b>                                                                        | 296                                                                    | 296                                  |
| $a, b, c$ (Å)                                                                                 | 9.1405 (14), 13.016 (2), 13.591 (3)                                    | 13.5644 (14), 9.4204 (9), 26.700 (2) |
| $\beta$ (°)                                                                                   | 107.064 (5), 101.287 (5), 99.980 (6)                                   | 95.262 (4)                           |
| $V$ (Å <sup>3</sup> )                                                                         | 1469.2 (4)                                                             | 3397.4 (6)                           |
| $Z$                                                                                           | 1                                                                      | 4                                    |
| <b>Radiation type</b>                                                                         | Mo $K\alpha$                                                           | Mo $K\alpha$                         |
| $\mu$ (mm <sup>-1</sup> )                                                                     | 1.06                                                                   | 0.77                                 |
| <b>Crystal size (mm)</b>                                                                      | 0.38 × 0.24 × 0.20                                                     | 0.42 × 0.20 × 0.18                   |
| <b>Diffractometer</b>                                                                         | Bruker Kappa APEXII CCD                                                | Bruker Kappa APEXII CCD              |
| <b>Absorption correction</b>                                                                  | Multi-scan (SADABS; Bruker, 2007)                                      | Multi-scan (SADABS; Bruker, 2007)    |
| <b>No. of measured, independent and observed [<math>I &gt; 2\sigma(I)</math>] reflections</b> | 15334, 6557, 3603                                                      | 18149, 7880, 5313                    |
| $R_{int}$                                                                                     | 0.057                                                                  | 0.051                                |
| $(\sin \theta/\lambda)_{max}$ (Å <sup>-1</sup> )                                              | 0.652                                                                  | 0.653                                |
| $R[F^2 > 2\sigma(F^2)]$ , $wR(F^2)$ , $S$                                                     | 0.061, 0.169, 0.96                                                     | 0.055, 0.128, 1.04                   |
| <b>No. of reflections</b>                                                                     | 6557                                                                   | 7880                                 |
| <b>No. of parameters</b>                                                                      | 320                                                                    | 455                                  |
| <b>No. of restraints</b>                                                                      | 3                                                                      | 186                                  |
| <b>H-atom treatment</b>                                                                       | H atoms treated by a mixture of independent and constrained refinement | H-atom parameters constrained        |
| $\Delta\rho_{max}, \Delta\rho_{min}$ (e Å <sup>-3</sup> )                                     | 0.82, -0.63                                                            | 1.15, -0.71                          |



**Table S2. Important bond lengths (Å) and bond angles (°) in C3 and C4**

|           | Bond lengths (Å) |             | Bond Angles (°) |             |
|-----------|------------------|-------------|-----------------|-------------|
|           |                  |             |                 |             |
| <b>C3</b> | Zn1—N2           | 2.033 (3)   | N2—Zn1—N1       | 76.43 (13)  |
|           | Zn1—N1           | 2.211 (3)   | N2—Zn1—N3       | 75.80 (13)  |
|           | Zn1—N3           | 2.226 (3)   | N1—Zn1—N3       | 152.16 (13) |
|           | Zn1—Cl1          | 2.2907 (12) | N2—Zn1—Cl1      | 125.54 (10) |
|           | Zn1—Cl2          | 2.3009 (12) | N1—Zn1—Cl1      | 98.42 (10)  |
|           |                  |             | N3—Zn1—Cl1      | 96.01 (10)  |
|           |                  |             | N2—Zn1—Cl2      | 117.44 (11) |
|           |                  |             | N1—Zn1—Cl2      | 98.17 (10)  |
|           |                  |             | N3—Zn1—Cl2      | 96.28 (10)  |
|           |                  |             | Cl1—Zn1—Cl2     | 116.96 (5)  |
| <b>C4</b> | Cd1—N2           | 2.278 (3)   | N2—Cd1—O3       | 142.64 (12) |
|           | Cd1—O3           | 2.292 (3)   | N2—Cd1—N1       | 71.01 (12)  |
|           | Cd1—N1           | 2.369 (3)   | O3—Cd1—N1       | 112.47 (12) |
|           | Cd1—N3           | 2.387 (3)   | N2—Cd1—N3       | 70.34 (11)  |
|           | Cd1—Cl1          | 2.5023 (11) | O3—Cd1—N3       | 98.80 (13)  |
|           | Cd1—O4           | 2.538 (3)   | N1—Cd1—N3       | 141.34 (11) |
|           |                  |             | N2—Cd1—Cl1      | 124.41 (8)  |
|           |                  |             | O3—Cd1—Cl1      | 92.36 (9)   |
|           |                  |             | N1—Cd1—Cl1      | 99.99 (9)   |
|           |                  |             | N3—Cd1—Cl1      | 100.87 (8)  |
|           |                  |             | N2—Cd1—O4       | 91.03 (12)  |
|           |                  |             | O3—Cd1—O4       | 52.65 (12)  |
|           |                  |             | N1—Cd1—O4       | 90.37 (11)  |
|           |                  |             | N3—Cd1—O4       | 91.13 (12)  |
|           |                  |             | Cl1—Cd1—O4      | 144.56 (9)  |

**Table S3. Hydrogen bond geometry (Å, °) in C3 and C4.**

|                             | <b>D—H···A</b>                 | <b>D—H</b> | <b>H···A</b> | <b>D···A</b> | <b>&lt;(D—H···A)°</b> |
|-----------------------------|--------------------------------|------------|--------------|--------------|-----------------------|
| <b>C3</b>                   | C5—H5···O2 <sup>i</sup>        | 0.93       | 2.53         | 3.188 (6)    | 128                   |
|                             | C9—H9···O2                     | 0.93       | 2.27         | 2.800 (6)    | 115                   |
|                             | C10—H10···Cl2 <sup>ii</sup>    | 0.93       | 2.82         | 3.590 (5)    | 141                   |
|                             | C11—H11···Cl2 <sup>iii</sup>   | 0.93       | 2.86         | 3.459 (5)    | 124                   |
|                             | C12—H12···Cl1                  | 0.93       | 2.87         | 3.411 (4)    | 119                   |
|                             | C12—H12···Cl2                  | 0.93       | 2.85         | 3.550 (5)    | 133                   |
|                             | C21—H21···Cl1                  | 0.93       | 2.98         | 3.551 (5)    | 122                   |
|                             | C21—H21···Cl2                  | 0.93       | 2.89         | 3.555 (4)    | 130                   |
|                             | C23—H23···Cl1 <sup>iv</sup>    | 0.93       | 2.87         | 3.679 (5)    | 147                   |
|                             | C24—H24···O1                   | 0.93       | 2.11         | 2.735 (6)    | 124                   |
| C24—H24···O3 <sup>iv</sup>  | 0.93                           | 2.53       | 3.221 (11)   | 132          |                       |
| C25—H25B···Cl1 <sup>v</sup> | 0.97                           | 2.97       | 3.785 (6)    | 142          |                       |
| O3—H3A···O1 <sup>ii</sup>   | 0.82 (1)                       | 2.12 (6)   | 2.890 (9)    | 156 (15)     |                       |
| O3—H3B···O2 <sup>i</sup>    | 0.82 (1)                       | 2.26 (4)   | 3.054 (9)    | 166 (12)     |                       |
| <b>C4</b>                   | C5—H5···O2 <sup>i</sup>        | 0.93       | 2.48         | 3.206 (6)    | 135                   |
|                             | C11—H11···O4 <sup>vi</sup>     | 0.93       | 2.30         | 3.135 (6)    | 149                   |
|                             | C12—H12···O1                   | 0.93       | 2.14         | 2.717 (6)    | 119                   |
|                             | C21—H21···O2                   | 0.93       | 2.28         | 2.810 (6)    | 115                   |
|                             | C22—H22···Cl1 <sup>vii</sup>   | 0.93       | 2.97         | 3.704 (5)    | 137                   |
|                             | C24—H24···Cl1                  | 0.93       | 2.72         | 3.598 (5)    | 158                   |
|                             | C25—H25A···Cl1 <sup>viii</sup> | 0.97       | 2.72         | 3.617 (5)    | 154                   |

**Symmetry codes:** (i)  $-x+1, -y, -z$ ; (ii)  $x+1, y, z$ ; (iii)  $-x+1, -y, -z+1$ ; (iv)  $-x, -y+1, -z+1$ ; (v)  $x-1, y, z$ ; (vi)  $x, y+1, z$ ; (vii)  $x, y-1, z$ ; (viii)  $-x+3/2, y-1/2, -z+1/2$ .

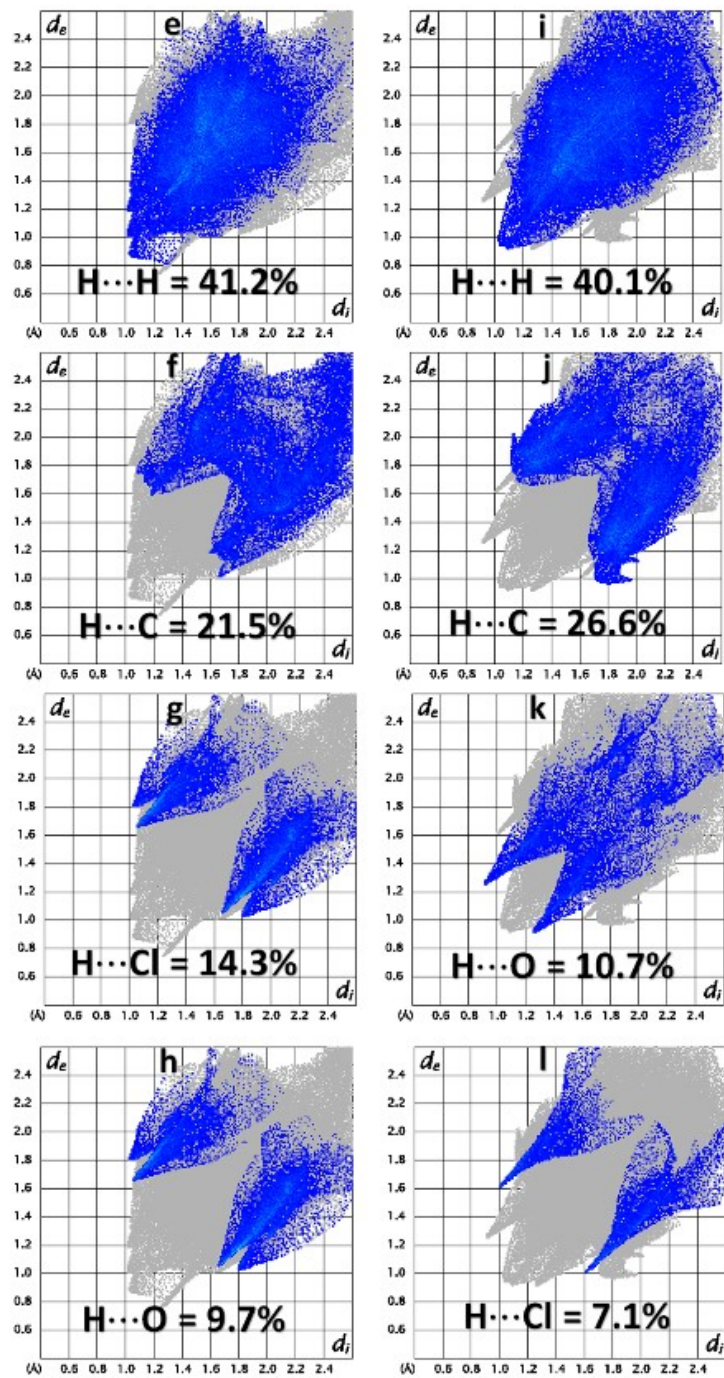

Fig. S6. 2D fingerprint plots for main molecule of (e-h) C3, (i-l) C4

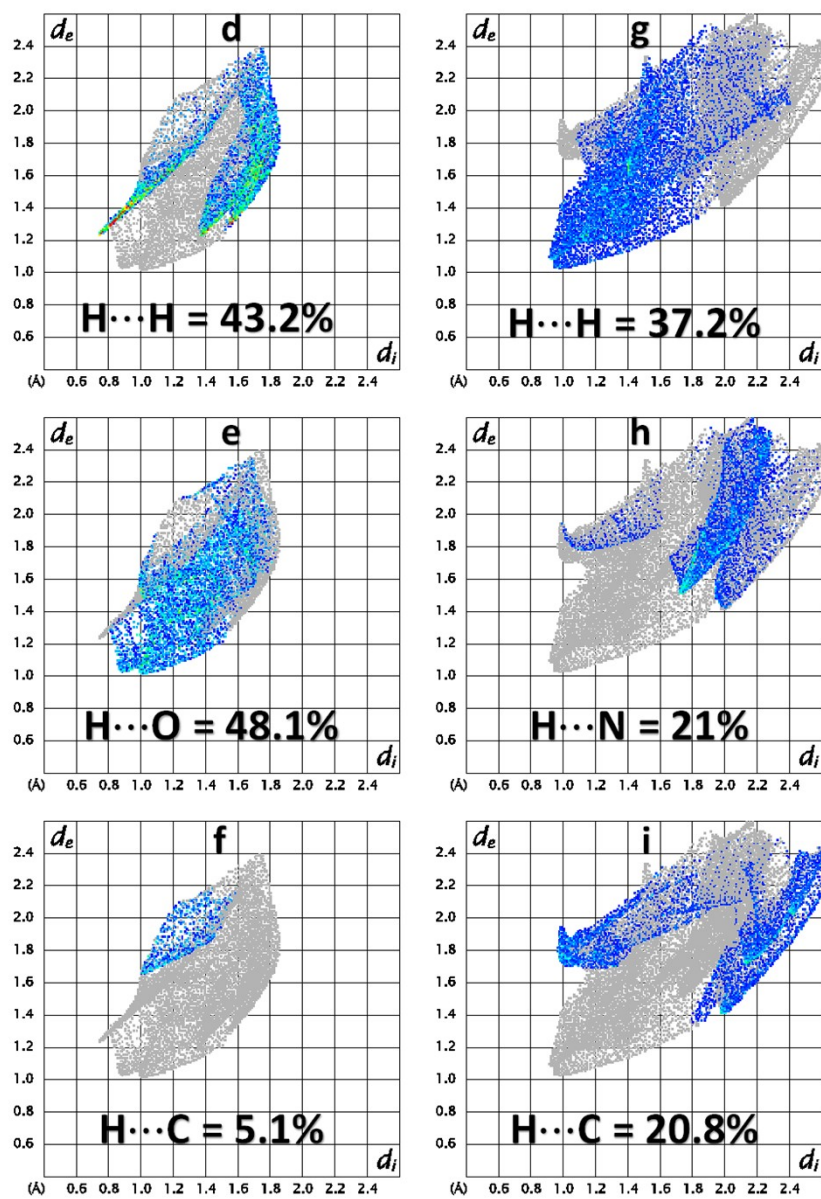

**Fig. S7.** 2D fingerprint plots for solvent molecules of (d-f) C3, (g-i) C4.

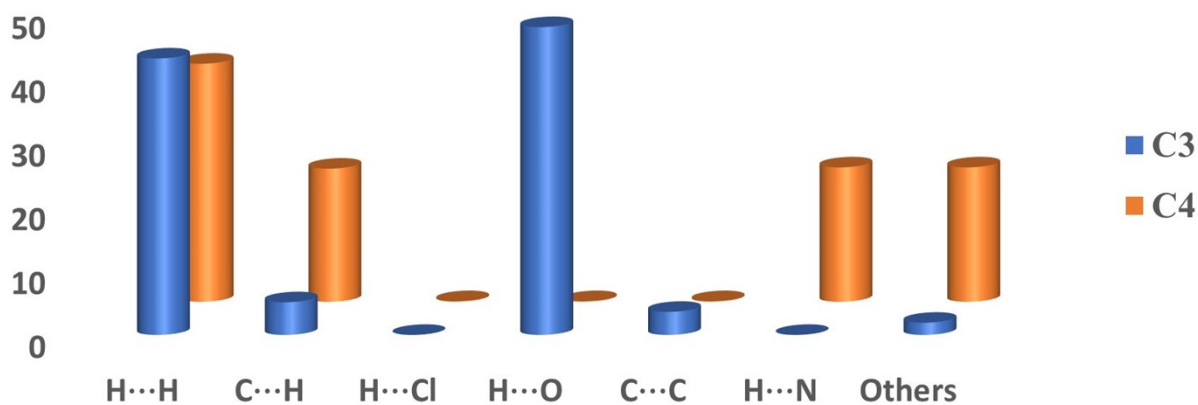

**Fig. S8.** Contribution of some important intermolecular contacts in the solvent molecules for the Hirshfeld surface of the complexes (C3 and C4)

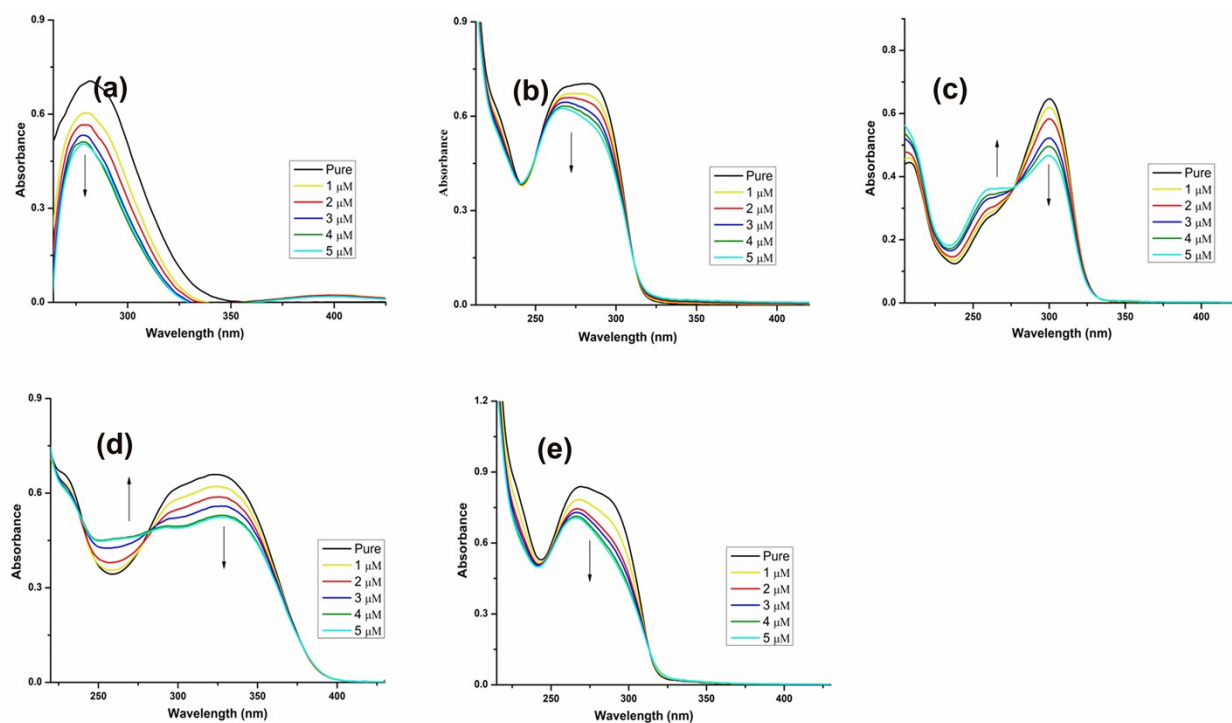

**Fig. S9.** Absorption titration curves of compounds (a)  $H_2L^m$  (b)  $H_2L_{Me}^m(OTf)_2$  (c) C1 (d) C2 (e) C3 in Tris-HCl buffer solution containing varied CT-DNA concentrations.

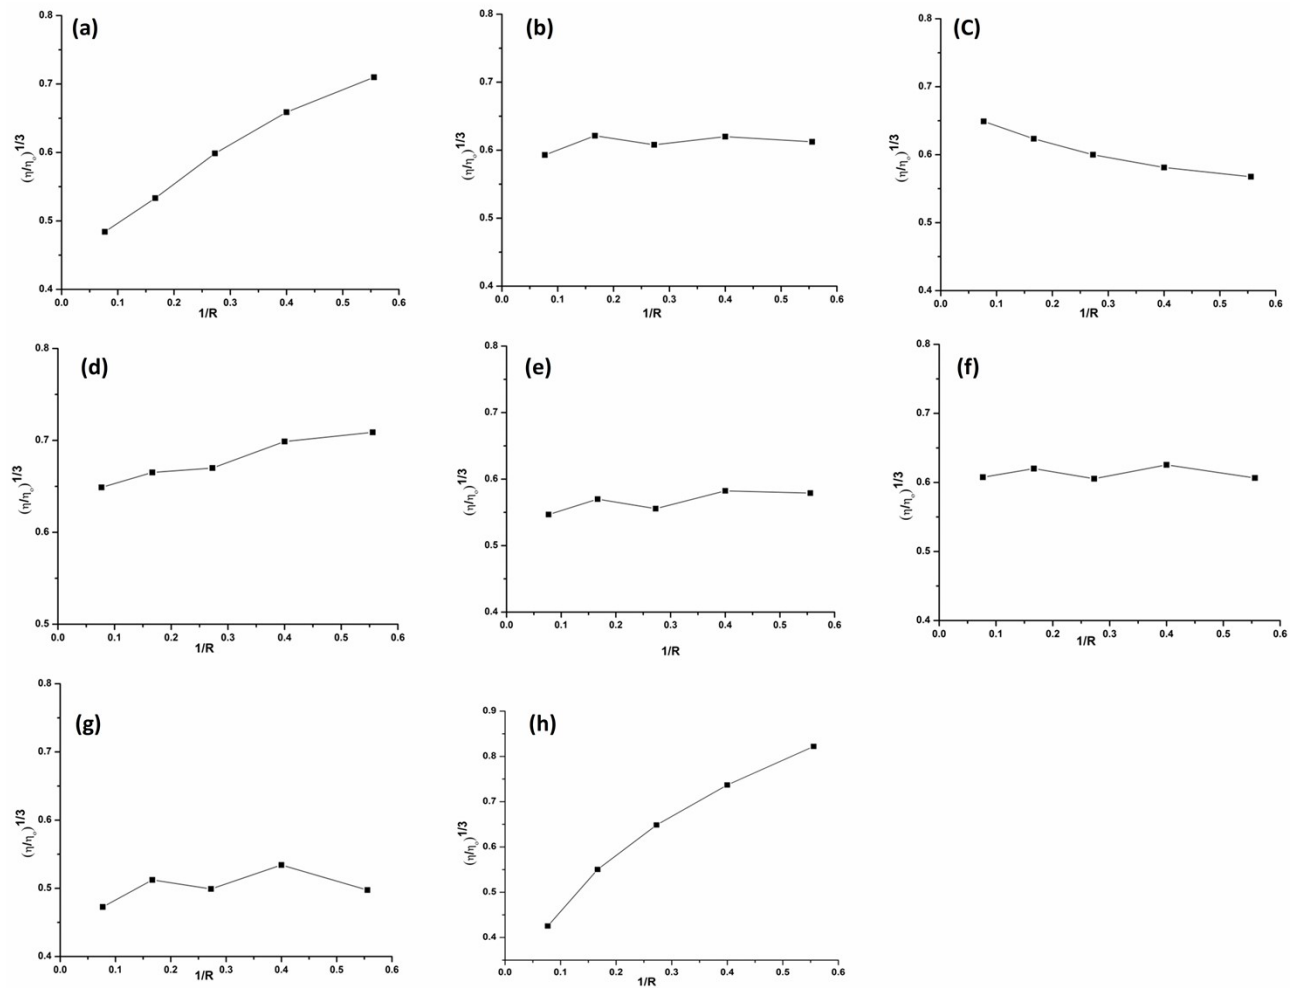

**Fig. S10.** Variation of the relative specific viscosity parameter  $[(\eta/\eta_0)^{1/3}]$  vs  $1/R$  (a)  $H_2L^m$  (b)  $H_2L^m(OTf)_2$  (c)  $H_2L^m(Cl)_2$  (d) C1 (e) C2 (f) C3 (g) C4 (h) EtBr by keeping constant CT-DNA concentration
